# Supplementary material for: Guanidinoacetic Acid Regulates Myogenic Differentiation and Muscle Growth Through miR-133a-3p and miR-1a-3p Co-mediated Akt/mTOR/S6K Signaling Pathway
Source: Int J Mol Sci. 2018 Sep 19;19(9):2837. doi: 10.3390/ijms19092837 (PMC6163908; doi:10.3390/ijms19092837)
Supplement: Supplementary file 1 [file ijms-19-02837-s001.zip]

Archive with 5 entries (5 files):
- Figure S1.pdf
- Figure S2.pdf
- Figure S3.pdf
- ijms-352774-supplementary.pdf
- Wang et al. Supplement table S1-S5 .xlsx
