# Supplementary material for: Guanidinoacetic Acid Regulates Myogenic Differentiation and Muscle Growth Through miR-133a-3p and miR-1a-3p Co-mediated Akt/mTOR/S6K Signaling Pathway
Source: Int J Mol Sci. 2018 Sep 19;19(9):2837. doi: 10.3390/ijms19092837 (PMC6163908; doi:10.3390/ijms19092837)
Supplement: Supplementary file 1 [file ijms-19-02837-s001.zip › Wang et al. Supplement table S1-S5 .xlsx]

## Sheet: Table S1
Table S1. The primer sequences used for qRT-PCR (F: forward, R: reverse)
Gene	Primer Sequence (5'-3')	TM/℃
CCND1	F-TAGGCCCTCAGCCTCACTC	60
	R-CCACCCCTGGGATAAAGCAC
CDK4	F-AGTTTCTAAGCGGCCTGGAT	60
	R-AACTTCAGGAGCTCGGTACC
MyoG	F-GCCCAGTGAATGCAACTCCCACA	58
	R-CAGCCGCGAGCAAATGATCTCCT
MyoD	F-AGACTTCTATGATGACCCGTGTT	57
	R-TCAGCGTTGGTGGTCTTGC
P-21	F-CAAAGTGTGCCGTTGTCTCT	63
	R-AAGTACTGGGCCTCTTGTCC
MyHCⅠ	F-GCCTGGGCTTACCTCTCTATCAC	56
	R-CTTCTCAGACTTCCGCAGGAA
MyHCⅡx	F-GGACCCACGGTCGAAGTTG	55
	R-CCCGAAAACGGCCATCT
MyHCⅡb	F-CAATCAGGAACCTTCGGAACAC	56
	R-GTCCTGGCCTCTGAGAGCAT
Catheosin L	F-GTGGACTGTTCTCACGCTCAAG	61
	R-TCCGTCCTTCGCTTCATAGG
Atrogin	F-GCAAACACTGCCACATTCTCTC	63
	R-CTTGAGGGGAAAGTGAGACG
GAPDH	F-GCCTTCCGTGTTCCTACCC	63
	R-CCTGTTGCTGTAGCCGTATTC
miR-133a-3p	F-TTTGGTCCCCTTCAACCAGCTG	60
	R-Uni-miR qRT-PCR Primer, included in kit (TaKaRa)
miR-1a-3p	F-TGGAATGTAAAGAAGTATGTAT	60
	R- Uni-miR qRT-PCR Primer, included in kit (TaKaRa)
U6	F: CTCGCTTCGGCAGCACA	60
	R: AACGCTTCACGAATTTGCGT

## Sheet: Table S2
Table S2. Overview of small RNA sequencing data
Sample	NC-1	NC-2	GAA-1	GAA-2
Total Raw Reads	14758273	14698575	14124050	11417056
Total Clean Reads	8801601	9677281	9863821	7282592
Clean Reads Rate (%)	59.64	65.84	69.84	63.79
Low Quality Rate (%)	0.01	0	0.01	0.01
Raw Reads Q20 (%)	95.53	97.39	96.52	97.32
Raw Reads Q30 (%)	93.69	96.54	95.07	96.46
Clean Reads Q20 (%)	96.93	98.39	97.38	98.41
Clean Reads Q30 (%)	95.34	97.91	96.04	97.97

## Sheet: Table S3
Table S3. the target genes of differential expression miRNAs
the differential expression miRNA target genes were predicted by TargetScan
mir-133a-3p	miR-144-3p	miR-1843b-3p	miR-1a-3p	miR-208b-3p	miR-335-3p	miR-6412	miR-671-3p
SEC61B	IGIP	RP11-176H8.1	CORO1C	VAV3	CDR1as	NPY5R	C15orf37
LHFP	UCHL3	NPPA	FAM150B	LRRTM1	ATRX	FAM110B	C15ORF37
PTBP1	NFE2L2	IER5	SERP1	CSNK2A2	FUT9	OSBPL9	LRRCC1
TAGLN2	EIF4G2	ATXN3	SRI	STC1	HMMR	ZFHX4	AWAT1
RBMX	RARB	IMPG1	RIT2	ETS1	CNKSR2	SKA1	NEUROG3
PRAF2	ATP5G2	LDHD	TMSB4X	ELAVL4	SCGB3A2	CNDP1	RHBDL3
CLTA	C19orf73	FLNB	SLC44A1	HOXD3	AL627171.2	CTGF	HIAT1
CELF4	ARID2	RPS16	ARCN1	DMRT2	POU5F1B	COMMD10	LTBR
HRSP12	NYAP2	WNT2B	SRSF9	UBE2V2	PRM1	PIM1	GIPR
AF196779.12	COX7C	STXBP3	CXCL11	LIN28B	LY86	GALNT16	MARC2
TIMM17A	TSPAN3	UBALD2	CITED2	PTAR1	LYAR	CENPV	CDKN1C
WDR45	GPR183	C20orf26	GJA1	RAB5C	SMIM9	TRIB1	EHF
SLC50A1	GBE1	IGSF21	NDRG3	EBF1	ZNF544	MREG	CDCA5
SLC6A1	C5orf24	LAMB2	DGKE	QKI	C1orf54	HILPDA	AC002472.13
TFAP2D	TFRC	ECT2	PTPLAD1	SOS2	CRYBA4	SNAP91	CRADD
CMPK1	MSX1	ZNF418	ABHD2	FOXP2	THAP1	NR3C2	TEAD2
GPM6A	SORCS3	ID1	PGRMC1	EEF1A1	KRTAP6-1	ADRB1	KCNG4
PPP2CA	HERPUD1	WASF3	IGF1	CELF2	C9orf135	RARRES1	P2RX7
GABPB2	TNFSF11	ST6GALNAC2	G6PD	CDKN1A	RGS7BP	TTC33	CLDN2
GDNF	UBE2G1	FAM83C	BDNF	MED13	NPPC	KCNE4	RALGPS2
PRRT2	MEF2A	ADAM9	ETS1	CDCA4	LRRIQ4	HOXA13	NTRK2
P2RX4	MEIS2	AC104472.1	HNRNPU	H2AFZ	NBEAL1	FKBP10	PRRC2B
EFNA4	VPS4B	KRT74	CAAP1	TSPAN12	ZFP1	MBP	TAF9B
DLX3	KIF2A	PAN3	E2F5	DCAF12	FAM27E3	CEBPB	ARHGAP19-SLIT1
SUMO1	LCOR	EN1	MMD2	DGCR8	FAM27E1	ETV6	ADTRP
LASP1	PCDH18	IKZF2	MMD	APC	FAM27E2	LIN28A	TFAP2C
SIMC1	PTHLH	DNAH10OS	C12orf4	CHSY3	PMPCB	RNFT1	AC007461.1
SHISA5	THAP1	CDYL2	PPIB	RAD51L3-RFFL	HCCS	BTBD3	CHDH
ELFN1	PURA	E2F1	SMIM14	RANBP9	SLC13A1	ACTR1A	NTNG1
SLC52A2	PANK1	SERTAD4	ZNF597	DERL2	PPP1R42	AL592284.1	SPINT2
FAM117B	CCNG2	RORA	UST	OSBP	CMTM2	FOXC2	SPEF1
PAX7	ABTB2	GSR	TWF1	RFFL	ERBB4	UBL4B	LPHN3
PPP2CB	FST	RPL22	BSCL2	MTF2	AL391152.1	AP5S1	PACSIN1
ST8SIA3	PEX11B	AICDA	TMEM178A	HOXD10	GRPR	FAM175A	LIN9
SLC30A7	FBXO32	ZMYND8	MAL2	TESK2	TMEM233	FAN1	SPTSSB
LANCL2	BRPF1	ZNF536	RABEPK	BHLHE41	IFI44	FAM13C	LINC00998
ACTN4	CAV2	KCNJ10	SMARCB1	EIF3J	ARL15	SUPT16H	B3GALT5
EDEM1	FAM60A	DGCR2	PAX3	SLC35A4	STMN2	PDLIM1	GRIK4
GABARAPL1	RASA1	SNX18	TMEM243	EIF4E3	CACNG2	RUNDC3B	VPS53
SYT1	HDGFRP3	PRND	LPAR5	SHISA6	GTF2IRD1	YPEL3	POU4F2
UBE2Q2	GDF10	PLAG1	EIF1AX	FZD8	FAM150B	LPCAT2	CLEC4A
ARFIP2	HOXA7	NOL4	TMEM257	EIF4G2	TSTD1	FAM69C	PREX1
SGMS2	APPBP2	TMEM154	ANXA2	FOXG1	BOD1L2	SLC25A43	C5orf64
FAM57A	SUMO3	SNX27	TSPAN4	KCNN3	CFHR3	DHRS7B	UNC13A
NUP160	TBX1	KCNJ12	CCSAP	PACS2	CD36	PDE7B	SEMA5B
ZNF131	LUZP6	SATB2	AP1G1	PDCD4	HDGFRP2	WIF1	EDNRA
NAGS	MYCN	ADRA1A	TPM4	GATA4	CCDC126	MAPK1IP1L	RBBP9
MAML1	FUBP3	MAP3K1	BRI3BP	NABP1	GATS	MUC1	POU6F2
VPS54	CXorf23	GLTSCR1L	NXT2	SIX1	SYCP1	RALGPS2	PALM2
DOLPP1	UBE2D2	RAB23	TMEM55B	SNRK	BUB3	DLX3	DMRT1
TMEM167A	PAFAH1B1	AMOT	ELOF1	EIF4A2	FAM154A	FAM171B	ZNF395
SEC61A1	EPB41L2	HDAC4	GPR6	PURB	ABCC5	DHTKD1	SLC5A2
EIF4A1	KCNMB2	CDC42BPB	CPLX2	DPYSL2	QSER1	WASF2	ZADH2
GLRA2	TFAP4	SV2C	RAB43	ANKS1B	BRCC3	MSMO1	HOXD12
ANKRD44	NR2F2	SIX3	PDCD10	PPP6C	C9orf40	COMMD5	RP5-850E9.3
LHX9	CASK	ACVRL1	EDN1	RAB11A	TCEAL1	TAF2	TMPRSS12
ANKRD28	UBE2D1	PPP1R9A	AZIN1	AMOT	GALNTL5	G2E3	NMT1
LDLRAP1	MOB4	AP3D1	ADPGK	EYA4	CD300LD	GPR111	TIMM17A
SYT2	ACBD3	ZFP82	TAGLN2	OSBPL1A	MYO9A	C3orf70	GNAQ
RAP2C	FAM150B	RANBP3	TIMP3	FNIP1	SYCP2	DKFZP434H0512	ACVR1B
AFTPH	PCSK5	DCAF8	MSANTD2	RNF145	UFL1	RSPH10B2	CDC14A
GCH1	PHF3	DCAF8	AP1S1	PTPRG	TMED4	TMEM208	CCDC71L
YPEL2	NLN	SLC2A5	SNAP25	RIMS1	EID2B	KIAA0319L	FOXP2
KNDC1	KHDRBS3	ZHX3	MATR3	MTMR3	UPK3A	FAM84B	LRRC10B
BICC1	CYTH3	ZNF507	PIRT	VCPIP1	CCNB2	MCF2L	DLEC1
ENC1	C3orf58	PLEKHO1	MIPOL1	ASB7	PRC1	MBD2	RAB22A
DCBLD1	NUP37	RP1-170O19.20	VAMP2	JHDM1D	CXCL11	EFEMP2	IMP3
PAN3	ST18	HOXA9	RABGAP1L	LRCH2	PRUNE2	ANKH	C20orf24
SV2A	MEIS1	RAB5C	KCNIP3	TCF12	FAM174A	MS4A15	SRXN1
TRAM2	CHTOP	NXPE3	HMCN1	MYCBP	PABPC1	SCN5A	NKX2-3
HS2ST1	PLA2G4A	SHOC2	YWHAZ	GXYLT1	PAX3	STAC3	TGIF2-C20orf24
ZNF280C	HSPE1-MOB4	USP15	ANKRD29	ANKRD13C	ENPP2	LMO4	KBTBD11
KCNA6	E2F8		SP2	ARID5B	NT5M	ANKS1B	BIRC3
SH3GL2	GALNT3		OSBPL7	GPBP1	ACTL6B	SCRT2	KIAA0753
TMOD3	KDM3A		AJUBA	LRRC8A	JAZF1	SCML4	JARID2
SF3B4	ZNF800		TPPP	MINOS1	ARGLU1	SOX21	FAM3D
COL25A1	FAM193B		C5orf51	KPNA3	SH3BGRL	G3BP1	SNX24
SCN2B	GATA3		WDR48	SCN2B	ADCY1	EYA2	ARHGEF40
WASF2	MAP7D1		DDX5	EFNB1	CMC1	INSL5	TBX21
FOXC1	NGFRAP1		CDK6	ARID2	TMEM74	DUSP27	ATP9A
SOX4	C19orf81		YWHAQ	SECISBP2L	BPNT1	ZNF287	NLRC5
CERS2	SENP7		CNN3	IL1RAPL1	ZCWPW2	MRPL33	VPS26A
AL117190.3	BBC3		UBE2H	ZSWIM6	CLLU1	NAT9	DDT
CELF1	ALDH1A3		CTTNBP2NL	RAB21	LCE5A	ZNF286B	GREM2
EXD2	AHDC1		SLC10A7	CDH2	ARRDC5	ARF3	FGFBP3
CDYL2	PIM1		HOXB4	COLQ	PDZRN4	FAM13B	PTPLA
FAM46A	HSP90AA1		CLCN3	TSHZ2	SMR3B	GRIN2B	MBLAC1
SLC39A1	GSPT1		HIAT1	POGZ	CD200R1L	MMP16	CMTM6
SEPHS2	MARCKS		RSPO3	GLYR1	ADAM10	STX2	GSTM4
KIAA1429	KPNA1		FBXO33	EPHA5	DLK2	ZNF286A	BOLL
PTPRZ1	ATP1B1		C15orf54	KLF7	CDKN1B	PAFAH2	BCL7A
FGF1	MAPK6		KIF2A	LCOR	CD160	SMARCA4	FLJ14816
KIAA1045	APP		TRAPPC4	RYBP	SBDS	GOPC	HOMER2
RGL1	ETS1		TPM3	SOX6	RPE	XIAP	ZIC4
ATP6AP2	MARCH3		RRBP1	FAM110B	TUBD1	ERMAP	ACBD5
RB1CC1	CAPZA1		C1GALT1	SATB1	PI4KA	MYO5B	SPDEF
VAT1	EFNA2		ZNF580	EMB	C4orf29	CCNT1	AUTS2
RAD51L3-RFFL	USP42		MCTP1	PPP3CB	RP11-664I21.6	SEL1L	STT3B
CAPN15	ZBTB18		MEOX2	ELAVL2	MBD4	ABLIM1	RGS5
PTH1R	PCGF5		KCTD13	LRP6	ATG5	DLG1	TBC1D22B
HAPLN1	RIN2		SEC63	SRPK2	DNAJB9	ARID5B	GBX2
FOXL2	GLTSCR1		STC2	NOVA1	C9orf170	DCAF7	FRMD8
SOBP	BET1		POGK	SLC41A1	GZMH	AGPAT4	TTC39C
RARB	LHX2		PAX7	HNRNPC	ARHGEF9	PIGK	EVX1
DPYSL4	PABPC1L2B		KTN1	RFX7	COX7C	PTPLB	PLEKHA8
PURB	PDE7B		KLHL5	MAP3K2	HOXA10	CNGA3	EMP2
LETMD1	ZNF207		RNF138	GJA9	AF131215.5	TSPAN9	PHLDA3
NDRG1	ZDHHC21		FAM84A	EEA1	TBK1	UBAC2	HMGN2
SNX30	MAP3K8		KMT2E	FNDC3A	SLC38A5	CEBPA	GALNT1
RFFL	CELF2		CHSY1	MEIS1	KRTAP19-5	FOXD1	HIP1
DUSP1	ETV1		EPB41L2	SYAP1	TRMT10A	FAM171A1	CLMP
ZC3H7A	LIMCH1		RASA1	COL4A3	PNPLA8	SCD	RHBDF2
CELF6	SEC24A		TRIM2	ATAD1	F9	ITGB3	NMB
UBE2Q1	FAM222B		NAP1L5	BCL11B	REG3G	DMTN	NFYB
SOX8	EML1		LRCH1	TBC1D22B	CD48	POU4F1	PEBP1
VAMP2	DNAJC2		BET1	RNF152	ZNF605	PXDN	CITED4
PTPRK	TROVE2		SLC30A6	MYH10	NARS2	METTL8	IL13
LHX5	PPTC7		GLCCI1	NAV2	ST8SIA1	CNP	GIPC2
ARHGEF9	MTPN		RCAN3	USP24	LPAR4	FAIM2	MPHOSPH8
TBPL1	SMPD3		IFT80	VKORC1L1	NR2F1	FAM76A	ATF6B
BCL2L2	ITSN2		XPO6	TLE4	PDE4DIP	CDC23	RYBP
ZC3H11A	CCDC85A		GCLC	REEP1	CCL18	CHL1	HSPA12B
SGK1	GPR85		FUBP1	XKR4	CHRNA5	TOB2	ATP11A
LDOC1	SREK1		GCH1	H2AFY	TMSB10	NFIX	GRAMD1C
CDIP1	ZFX		PPP4R2	CFL2	RNASE9	FMO6P	OPCML
MMGT1	BCL2L2-PABPN1		DHX15	UBN2	ATP6V1G1	PRKAR1A	MAF
CASC3	PTPN12		SNAI2	SCRN1	AC023632.1	ECI2	C1orf68
BCORL1	GLCCI1		MAB21L1	SRCIN1	GGH	XBP1	ITGA10
MECOM	STRN		USP33	FBXO42	SNAP23	POU4F2	TCF7
PFN2	NLK		BAG4	FZD4	SERPINB10	RSPH10B	CNGA3
SLC6A6	HS2ST1		GPR125	THRA	CEP44	KLF4	MANEAL
THRAP3	SUCLA2		KALRN	MED7	MS4A7	SAMD12	SPOCK1
YES1	KLF12		SNX25	CCDC71L	ZFX	CBR1	GALNT10
ATP6V0D1	GRM5		THBS1	PTPN4	CTHRC1	SFMBT2	FAM170B
FBXL2	HTRA3		FAM155A	PTBP2	MRPS28	WBP2NL	C15orf57
CPNE3	RGS17		GATA6	CDC27	IDI1	TRAK1	PTMA
SGTB	FMR1		SH3BGRL3	SLC24A2	RPL30	HNRNPA3	FOXI1
TMEM170B	NPTX1		MET	ANKRD40	IDH3B	C15orf26	ST6GALNAC5
RCE1	FBN2		HELZ2	SP3	ACTR3C	C1orf213	RP1-127H14.3
CCDC176	RORB		LPPR4	HP1BP3	AGPS	DPY19L1	RHOB
CTBP2	LSM14A		CPEB1	KLHL15	ERMN	IL2RG	ZNF318
NNAT	MDM4		CDK14	EML4	TMEM100	DCLRE1B	SMEK2
C20orf194	UCK2		OTX2	AGO3	EPHA3	PPP1R3B	PPP1R12C
BTBD3	LHX1		KANK4	NLK	CXCL13	RICTOR	KIF1B
HPCAL4	RGMA		HSPD1	CHD9	CASP5	CAMSAP2	FBXL19
CECR6	SOX1		HS3ST3B1	KIAA0141	THAP6	CDCA7	KCNA5
PEX5L	TOX		EML3	PTPDC1	MDM1	CTD-2207O23.12	SMIM15
RPL17-C18orf32	CAMKK2		STARD7	HIC2	PPIL1	MDFI	LSMEM1
RIMS1	TET2		PLA2G4A	SOX4	MNDA	TAOK1	PKHD1L1
PPFIA3	MSI1		ARF3	HNRNPA2B1	C12orf50	GRAMD4	DIP2A
NRIP3	GATA2		WDR61	MAPK6	LECT1	SLC6A6	SIX2
CRLF3	EBF1		GPD2	SNX2	WFDC11	NEK7	ARL5B
CRK	GLTSCR1L		BPNT1	MMP16	EPHX3	ILF2	TSSK6
GARNL3	CDK8		FAM73B	TMBIM6	ZBTB11	ZNF213	SEPT3
ELAVL1	VKORC1L1		SYT1	DYRK2	PDS5A	PAPOLG	ADO
KCTD20	RAB30		SLC20A1	CLYBL	BCOR	NABP1	IL1F10
MMP15	ONECUT3		PIK3C2A	C6orf120	HNF4G	TRAF3	HMGXB4
GXYLT1	ALS2		DCAF12L1	HOXD9	AC093802.1	NT5DC3	SLC25A1
VAPB	AHCY		NCK2	DLD	PCP4	GRM4	MFN1
AKAP9	ACBD5		ARL10	CDC6	BRD1	C3orf27	LRRN1
FGFR1	YLPM1		SLC37A3	SP9	KRTAP1-3	R3HCC1	FBXO32
XPO4	SCN1A		CERS2	YBX1	BCL2L2-PABPN1	PITPNM3	KRT80
RAB30	SLC23A2		DPY19L3	ARGLU1	TMEM237	IL6R	DUSP16
CDK13	DCBLD2		CLTC	CRP	GLB1L3	ABCF2	RND3
MEIS1	TMEM65		NFATC3	SPNS2	RBFOX2	SRP9	PGAP3
TSPAN18	QKI		HNRNPK		TCEAL6	STON2	BRI3BP
ARHGAP12	HSF2		SLC35F1		ZFY	MAOB	RHOC
SLC35F5	USP46		BCL2L2		LRRC18	TMEM236	RP11-156E8.1
SLC7A8	GCLC		MYOCD		AC004899.1	INHBC	CRYBB1
MSN	PABPN1		YIPF5		XCL1	TMEM236	DNAJC16
PTPRD	STRN3		LCOR		TNFSF4	RAP2A	NT5C2
PLXNA3	CBX4		SMAP1		PITX2	KCNJ9	GRIA1
SGPP1	CDS1		CALM2		UBE2W	SLC23A2	TRPS1
KIAA1432	MBNL1		PDIK1L		FAM126B	PRRG3	DGKG
RAVER1	ZFP36L2		ZMYND8		NEIL2	CASK	CCDC3
SYNPO2L	MBTPS2		MTX1		MRPS36	ARID3A	POMGNT1
ZNF740	NCOA7		JUND		DOK6	DSEL	RDH11
STX5	FLRT3		ATP6V1A		SREK1IP1	ARL6	HAGHL
CNTNAP1	FAT4		SPRED1		ZBED5	UFM1	CACNG7
NMT1	DGCR2		ARID2		SOX9	VEGFA	NHSL1
PAPD5	MAFK		PTPRG		CXCL17	BEND4	UCN
ARL3	HOXA10		PLEKHO2		CADM2	PTPRR	AL590483.1
MYRF	SYNCRIP		H3F3B		NOV	PLEKHH2	RALBP1
ELF2	PDE3B		TBC1D15		PTGER4	CDC42BPA	CAPN15
TEAD1	ROCK1		SYN3		TCEAL2	GFPT2	NFKBIB
TPD52	KHDRBS2		HDGFRP3		NHLH2	ARHGAP9	DHCR7
PIK3C2A	TRIB1		MECOM		BEST2	KCTD7	COLQ
AQP1	NOL4		SRSF1		PABPC4L	RAPGEFL1	UBE2D1
FAM49A	AJAP1		NMT2		TCAIM	LTBP4	CBX5
COL8A1	CCNE2		DNAJC6		SOX12	PCDHB11	HOXD4
SERTAD4	PTP4A1		PICALM		BLOC1S6	ZNF638	TRAIP
PPFIA2	SHANK2		TBP		FGL1	CEP135	LDLRAD4
MEIS2	SALL1		ARHGAP21		RPGRIP1L	WHSC1	GATA2
UBXN7	CLK4		UNC119B		LAP3	SMURF1	BHLHE22
LRRC7	CACNA2D1		MAPK3		NETO1	SLC16A9	EMX2
PTPN22	WTAP		ZNF148		OR4D5	ALPK3	C16orf58
PPFIA1	RGL1		ZNF800		VBP1	VTI1B	MEX3D
OPCML	IKZF4		ZFP36L1		CCDC106	PIP4K2B	HAS3
DOT1L	ZBTB34		CDC42SE1		RGS18	CORO1C	ARL13B
QKI	APBA2		NETO1		AIM2	FAM150B	KANK1
SOGA1	ZCCHC2		ERMP1		CLCA4	SERP1	MED22
AFAP1	CPEB3		SPTLC1		FAM154B	SRI	FTSJ2
SESN1	RNF111		LIN7C		FGF18	RIT2	UMODL1
PITPNM2	FAM126B		GLIS2		B3GNT5	TMSB4X	IL22RA2
ANKRD12	RFX3		MBTD1		RAP1A	SLC44A1	SCN4A
TPM4	CAPN7		CDC42		TSPAN1	ARCN1	C22orf46
NELFA	METTL23		LMBR1		DNAJC24	SRSF9	SRRM3
EPHA7	ZNF362		MXD1		THSD7A	CXCL11	GPD1
TFE3	FBXW11		SLC25A22		TOE1	CITED2	C12orf76
KPNA6	SGPP1		OTUD5		CD2AP	GJA1	FBXL16
PREX1	SS18		SPTLC3		RPL10L	NDRG3	CLCN6
PER1	RPGRIP1L		BACH2		WDYHV1	DGKE	AC007405.2
ARPC5	MEGF9		RNF111		TAOK3	PTPLAD1	CPM
GREB1	FGF16		C16orf47		TSSK3	ABHD2	SOX1
SACM1L	ELAVL2		SEC61A1		ST3GAL6	PGRMC1	DUOXA1
LAMB3	CDK17		LETM1		LYRM2	IGF1	YWHAG
SLC25A39	PLD5		MRPL35		DDX1	G6PD	ZSWIM6
CRTAM	PRICKLE1		PHKG2		PDCD5	BDNF	JRKL
CPLX2	ABHD17B		SMYD4		CHUK	ETS1	ALDH9A1
MAP4	B3GAT2		TSPYL4		DUS4L	HNRNPU	RNASE11
MTMR4	XYLT1		SDCBP		ZNF800	CAAP1	BMP3
TXLNA	ZFY		STX6		CEP350	E2F5	ZNF784
RAPH1	PHLDA1		TMEM135		CBLL1	MMD2	BMP2K
BCL2L1	FOS		ANP32B		CCNC	MMD	FOXO3
TCF7	ARSJ		HSPE1		FBP2	C12orf4	N4BP2L1
TOR2A	RNF139		ALPL		EP300	PPIB	GPR37L1
TFG	SP4		CXCR4		MBTPS2	SMIM14	ARHGEF33
B3GNT9	SSX2IP		BLCAP		DNAJC19	ZNF597	SUFU
SUPT16H	FAM196A		PAX5		AMELY	UST	MEX3B
BTBD10	PTGS2		PTMA		AC022400.2	TWF1	TLL2
VTI1B	ZDHHC17		PDGFA		SDHD	BSCL2	SEC22C
PRDM16	PJA2		NR4A2		RBM41	TMEM178A	KLF5
USH1G	ZNF777		ANKRD34C		GLIPR1L2	MAL2	UHRF1BP1L
FAM43B	BICC1		PPP1R3B		BCAP29	RABEPK	C5orf45
CEP85L	TGIF1		PI4KA		BCMO1	SMARCB1	PCDH1
SCOC	CDH11		WDR1		CSN3	PAX3	CYP2U1
DIAPH2	SLC20A2		RSBN1L		RNF13	TMEM243	RAX
FOXN1	FOXG1		ATG13		LCORL	LPAR5	IPO8
EGFR	CDH20		WBP1L		AMELX	EIF1AX	TRIM29
KCND3	AFF4		DLG4		BARHL2	TMEM257	ZNF641
FAM19A5	EZH2		MPP7		ARPC5	ANXA2	POU3F3
RBPJ	MORN4		KHSRP		XKR4	TSPAN4	GNAZ
PPP2R2D	NEDD4		UBR5		TSPAN12	CCSAP	BCOR
GRID2	SAMD12		PTBP1		EPGN	AP1G1	THBS4
PRKCB	NID2		WBP2		MAL2	TPM4	HRK
ANKRD52	ELL2		EAF1		SPTSSA	BRI3BP	GPR63
SLC25A36	SON		VEGFA		NCKAP1	NXT2	ZFC3H1
LZTS2	PLAG1		WDR6		SLC25A40	TMEM55B	STC2
TNFRSF10B	SPATA2		TACR1		CABP5	ELOF1	ITPR2
MAML3	WIPI2		ATP6AP2		UTP18	GPR6	RABEPK
MAN1A2	SCAMP1		KLF4		AP3B2	CPLX2	LRRC7
SNRK	HNRNPAB		FAM91A1		TIA1	RAB43	EPB41L3
UNC13A	GRID2		DMPK		IGIP	PDCD10	BET1L
NCKAP5L	KAT6A		YPEL2		ZIK1	EDN1	HIF3A
CSNK1G3	PTEN		FOSB		ZFP36L1	AZIN1	TCERG1L
SLMO2	RAB1A		COL25A1		KANSL1	ADPGK	FAM117B
CKAP4	MCF2L		UTRN		INHBA	TAGLN2	FAM76B
UBE2K	SAP30L		RYBP		CBX3	TIMP3	XPR1
FBXW11	PPP2R2A		RNF165		MCCC2	MSANTD2	PHF21B
GRM5	CACNB2		FZD7		NIT1	AP1S1	PTPRJ
UBFD1	NEURL1B		RNF150		CYSLTR1	SNAP25	CRK
CACUL1	CHN2		GDF6		BASP1	MATR3	RBPJ
FOSL2	MBTD1		LRRC8A		TTC37	PIRT	BMP7
RBMS1	STAG1		RSBN1		NOS2	MIPOL1	EMX1
ERMP1	CDC42EP3		CLOCK		SPDYA	VAMP2	ADRA1D
GDI2	SLITRK4		TAOK3		SPA17	RABGAP1L	ATP10B
SLC8A2	ESCO1		EYA4		UBASH3A	KCNIP3	LOH12CR1
ITPRIPL2	PHTF2		CASK		NUDCD2	HMCN1	MGAT2
MED12L	MGRN1		KLF13		HMGN4	YWHAZ	ERMP1
POU4F1	EIF5		FBXW7		GTF2H2	ANKRD29	TEF
KLF7	PCDH10		ZMAT3		FAM169B	SP2	PAX3
RWDD2A	ST6GALNAC3		RARB		RP11-159D12.5	OSBPL7	PARVG
CTGF	TMEM161B		DGKZ		ST8SIA4	AJUBA	FGF5
TGFBR1	GJA1		TGIF1		HNRNPC	TPPP	NRP2
TBL1X	USP38		ZNF146		SLC25A31	C5orf51	UNC45B
NELL2	FILIP1L		SLC25A25		BNIP3L	WDR48	TRIB1
GPR173	ID4		NR1H3		STRBP	DDX5	PPP2R2A
POU6F2	EHMT1		SLC24A4		TAS2R5	CDK6	FGF11
TMEM200B	FNDC3A		VAMP4		ANK3	YWHAQ	GPR12
KLHL11	ZEB1		ZFP36L2		NUDT4	CNN3	BICD1
C1QL1	CPEB2		CTBP2		LRRC40	UBE2H	SEL1L
TENM1	SIK1		MAP3K1		ATAD5	CTTNBP2NL	NFIC
ZNF436	ZNF462		CA8		TFRC	SLC10A7	RNF144A
PWWP2B	ANKRD17		MNT		SEC11C	HOXB4	NAA25
KLHDC10	SRSF10		PEA15		CMC2	CLCN3	HEATR1
PFKFB3	LRRTM2		SEC62		PBRM1	HIAT1	XYLT1
FRS2	ONECUT2		ARFIP1		OSBPL9	RSPO3	AC022532.1
DYNC1LI2	ACSL4		TCF7L2		GPRIN3	FBXO33	NPAS3
GRIA2	PLXNC1		OLFML2A		ACBD5	C15orf54	PRKAB2
ASH1L	SLC12A2		PDPN		PRRX1	KIF2A	TENM3
UNK	JPH1		SMEK2		KIAA0101	TRAPPC4	STXBP5
ABCC1	ZBTB38		GIT1		HNRNPA3	TPM3	TNS1
MAP3K3	PALM2		NFATC2		KHDRBS3	RRBP1	VAT1L
FSCN1	STC1		ELF1		ZNF784	C1GALT1	CENPO
SEMA4G	FAM76B		HAND2		WRN	ZNF580	SGPP2
SLC7A2	BACH2		AKAP12		TBCA	MCTP1	SMAD3
TMEM110	AC068987.1		PHF6		ZNF256	MEOX2	GRM6
GRM7	AMMECR1		RNF38		TMEM19	KCTD13	BVES
IDH1	ST5		TNPO2		CYLC2	SEC63	TOX4
TJP2	ZC3H12C		LASP1		HFM1	STC2	FGF2
NR6A1	CDH2		TMCC1		LSAMP	POGK	TMCC3
AK2	FOXO1		TGIF2		C10orf32	PAX7	ATF7IP
TTYH3	RASD2		SGIP1		TIAL1	KTN1	SETBP1
ANK2	CASC4		SLC8A2		RPN1	KLHL5	KCTD12
ZBTB14	ARID4B		HOXA3		LINC00935	RNF138	CACNA1C
NCAM2	NCS1		MON2		ZCCHC2	FAM84A	PSMB2
HLF	EGFR		AVL9		PAPPA-AS1	KMT2E	IKZF2
SPTSSA	HAPLN1		PTPN1		LPPR1	CHSY1	FBN2
EYA1	DR1		HDAC4		VGLL2	EPB41L2	RIMBP2
EIF3J	RAPGEF2		KIAA2022		GGA1	RASA1	PIANP
USP6	MAP3K4		RAP1B		SH2D1A	TRIM2	NDOR1
IQGAP2	RSPO2		MAP1A		MCFD2	NAP1L5	SYNPO2
C17orf96	PPP1R16B		CCZ1		PTPN20B	LRCH1	PRPF4B
COL1A1	OTUD7A		SLC39A10		TMEM169	BET1	VAPB
SIX5	ZNRF3		ATF2		NEK1	SLC30A6	CIT
FOXG1	VCAN		ARPC1A		CWH43	GLCCI1	ATXN2
PPP1R9B	MYT1		PTPRA		MTRF1L	RCAN3	PCDH19
ESYT1	ZSWIM5		SLC7A2		VPS4B	IFT80	CADM2
SLC27A4	CAV3		KLHL15		MGA	XPO6	TRIM66
AP2M1	GPM6B		SLC35B4		PTPN20A	GCLC	AFF1
EYA4	PPFIA1		CREB5		ZNF831	FUBP1	AGO4
WTAP	BZW1		ACER2		PABPN1	GCH1	KSR2
RUNX1T1	MBNL2		PRKACB		C7orf31	PPP4R2	DGKH
SIRT1	FOSB		PGAM1		GCDH	DHX15	PPP6R3
ARX	PPP3R1		MUM1L1		CCDC168	SNAI2	SNX18
ZHX1	MED14		ANKRD23		TP63	MAB21L1	ENTPD7
TGFB2	POU2F1		MTSS1		RAB39B	USP33	EXOC7
XPO1	CEP135		SEMA6D		ATXN3	BAG4	ZMAT3
MTX3	NACC2		CPED1		ZBTB33	GPR125	IGF2BP1
CNNM2	DLG5		MPZ		CPA3	KALRN	MOCS2
SGSM1	NDRG4		SLC16A12		SLC16A9	SNX25	DFFA
HIVEP2	EDAR		KAT6A		PPM1B	THBS1	MTSS1
HS3ST5	KCNH7		KCNJ2		DTD1	FAM155A	ZBTB6
ZNF710	PUM1		DNAJC5		CT62	GATA6	RNMT
CREB5	PHF20L1		KAT6B		VPS37D	SH3BGRL3	MYO5A
SLC41A1	SKIL		ZZZ3		FUNDC2	MET	TPM3
MID2	RANBP9		TGFBR3		ATG10	HELZ2	PACS1
ZBTB16	GNAI3		GNAQ		TTC21B	LPPR4	PBX1
FAM13A	KAT6B		FAM168A		TMEM30A	CPEB1	PLA2R1
MRGBP	GNPTAB		PTPN4		ITGB2	CDK14	PARVA
DLG2	ROCK2		ZNF281		TEX26	OTX2	ICMT
FAF2	CAMSAP2		EPB41L4B		NEUROG1	KANK4	TCHP
MRFAP1	ATXN1		CAPRIN1		MAGEB16	HSPD1	CTNND1
LTBP1	PIK3C2A		FNDC3A		SNAI2	HS3ST3B1	FOXD3
ALDH5A1	EPB41		SLC8A1		RD3L	EML3	LHX4
MRVI1	KCND2		SRGAP2		BDH2	STARD7	BYSL
SOGA3	MARCH7		TTC7B		SLC25A17	PLA2G4A	CAPZB
DSTYK	PTCH1		TEX30		ZSWIM2	ARF3	SH3PXD2B
PPP6R3	KPNA3		C20orf112		MOB4	WDR61	SFT2D2
ADCY6	TSPAN12		FOXP1		VANGL1	GPD2	MARK1
SLC4A1	ARID1A		SLC25A36		MAGEB3	BPNT1	RFK
FLVCR1	PPIG		AP3D1		PARN	FAM73B	SLC25A17
NUS1	ZBTB7A		ISY1-RAB43		NAP1L6	SYT1	ING1
OTUD7B	SNN		TRHDE		GABRB1	SLC20A1	FOXN3
DNAJC3	TULP4		UNC50		NUDT15	PIK3C2A	KLF7
RHOA	PARN		WNT3		SMCO1	DCAF12L1	GPBP1
SP3	ZBTB21		ZNF217		CRP	NCK2	SAR1A
LIN7C	TJP1		CREBL2		MYF5	ARL10	TMEM245
PDIK1L	PRRC2C		MGAT4A		NAP1L3	SLC37A3	RIMS3
FOXP2	PAK7		MFSD9		NMT2	CERS2	SOX6
SP1	FMN2		WBSCR27		RAB1B	DPY19L3	OLFM2
PCDH17	ZNF148		RIMS4		SEPHS2	CLTC	PTPDC1
FOXP4	EEA1		FRS2		GTF2F2	NFATC3	PACS2
PTBP3	NEUROD1		ZC3H7B		RBMXL1	HNRNPK	TPRG1
HMGXB3	BBX		HSP90B1		HSCB	SLC35F1	NXPH3
KIRREL	UBE2D3		NECAB1		TM4SF1	BCL2L2	RBM23
ZNF217	SOBP		CREM		WNT3	MYOCD	OXNAD1
ZBTB7B	ADRB1		C17orf82		PP13004	YIPF5	SUGT1
ZNF385A	TP53INP2		FAM102A		NIPSNAP3A	LCOR	SS18
MLLT3	PSD2		ATXN1L		ZBTB37	SMAP1	C12orf4
SMPD4	KATNBL1		DNAJC13		TMEM207	CALM2	SULF2
AQP1	ARFGEF2		MAGI2		CTA-299D3.8	PDIK1L	ZDHHC2
FAM73A	ZC3H11A		JOSD1		TTN	ZMYND8	TMEM11
E2F7	DACT1		KCND3		GPR82	MTX1	PAWR
PPP2R5E	SULT4A1		ACPL2		NKAIN4	JUND	ASPHD2
ELMO1	CPEB1		HIVEP3		CRISP2	ATP6V1A	SDHAF1
ADCY5	NR5A2		PHLPP2		CRTAM	SPRED1	HSD17B8
DDX3Y	ANKRD12		GLCE		AASDHPPT	ARID2	UPK1B
GAB2	DUSP1		MED1		RASGEF1A	PTPRG	BHLHE41
JAZF1	AEBP2		TRPS1		KRTAP5-3	PLEKHO2	SMNDC1
ZBTB38	APLP2		SMAD9		SUSD3	H3F3B	CCSER2
KCNJ12	IPO8		BCL7A		UGT8	TBC1D15	GRK6
CDK5R1	BEGAIN		MEIS1		INTS9	SYN3	B4GALT7
KLHL5	ARID5B		NPAS3		GCFC2	HDGFRP3	NEK10
CNNM4	NPNT		PPTC7		KIAA1009	MECOM	NCAPH2
MAEA	RAP1A		DDX17		TIGIT	SRSF1	COX15
PCSK6	SLC4A10		ZBTB4		SV2A	NMT2	MRS2
MRC2	MTX3		RNF40		C5orf64	DNAJC6	EHD4
SPRY4	ADAMTSL3		PDRG1		SLC7A9	PICALM	C1orf27
FBXO30	PPP1R13B		ACTB		VWA9	TBP	PAGR1
ZBTB4	CDYL		CD2AP		GPR1	ARHGAP21	PAGR1
TPM3	KLF6		CCND1		EPHX2	UNC119B	CENPP
UBA2	ZBTB37		SASH1		OR4N2	MAPK3	SMIM12
AIF1L	EBF2		CCZ1B		AGO2	ZNF148	SLC45A4
GDF11	KBTBD2		DGKG		FER	ZNF800	CNKSR3
ZNRF3	AGRN		SFXN5		AL161915.1	ZFP36L1	USP9X
TOB2	BAZ2B		PCDH17		AZI2	CDC42SE1	FAM118A
KIF21A	DLGAP3		CSF1		FGF7	NETO1	TGIF1
SFXN5	PANX2		SETBP1		XKR9	ERMP1	TAF3
CSRNP1	UBA2		PDCD4		NDUFS5	SPTLC1	PDCD6IP
MLXIP	EPN2		GXYLT1		SUMO1	LIN7C	ERCC6
KIAA1522	YTHDF3		GNPTAB		MS4A14	GLIS2	RCAN1
GOLGA3	NEK7		HIPK3		CLHC1	MBTD1	C4orf32
SLC30A3	TGIF2		DLG2		SATL1	CDC42	SIPA1
TRHDE	CXXC5		AKAP13		ZNF653	LMBR1	SLC25A32
DCUN1D4	ANKRD11		RAP1A		KCNIP1	MXD1	ELOVL6
MIER3	PBX3		CTNND2		HOXB4	SLC25A22	BNC2
VAMP3	ADAMTS17		STAG2		AC117395.1	OTUD5	ADNP
ADAMTS5	RAB39B		NOTCH3		VMA21	SPTLC3	NINJ1
UBE2Z	ATXN1L		CBL		MMP16	BACH2	NBAS
PEAK1	HERC2		FRAS1		C18orf54	RNF111	CCDC149
XXbac-BPG32J3.20	AL162407.1		SLC39A9		DCUN1D1	C16orf47	CDKN2AIP
PTPN3	TMEM55A		TRIM44		RPE65	SEC61A1	BRMS1L
TGOLN2	PTPRJ		PMEPA1		CALB1	LETM1	FANCB
PTMA	SHISA6		CALM1		TMPRSS11BNL	MRPL35	HEATR6
LPGAT1	OTUD4		DLG1		MYCN	PHKG2	USP48
RAB5C	INO80D		PTPRJ		ACVR1C	SMYD4	ZNF226
SH3PXD2B	PIEZO1		G3BP1		ALG13	TSPYL4	ZNF581
EMP2	PTPN5		GNPNAT1		CKMT1B	SDCBP	INTS7
SMARCA2	HGF		TFE3		SLC17A8	STX6	HMGN3
SLC33A1	PDE4A		WASL		CNPY2	TMEM135	TMEM37
SYAP1	CDH5		AGO1		TRPM7	ANP32B	CDR1
RFX3	LDLRAD4		HNRNPA1		RAP2A	HSPE1	GALT
ZNF395	ERO1L		ZADH2		EFCAB1	ALPL	BAG2
PRDM1	PAPOLG		MAP4K3		TMEM184A	CXCR4	STAM
SORBS3	ENAH		ASXL3		TAF7	BLCAP	ZFP36L2
NFIB	ZFAND4		RSF1		RRH	PAX5	FFAR1
POLH	TNPO1		NGFR		EDIL3	PTMA	PPP1R15B
ARHGAP39	USP47		NUCKS1		CCDC179	PDGFA	ZNF703
WNT4	ARHGAP26		VEZF1		C7orf41	NR4A2	HNRNPUL1
GABBR2	AGO2		THRB		BCL11B	ANKRD34C	BMP10
MPPED1	MYB		CBX6		FPR2	PPP1R3B	METTL24
TET3	MAGI2		BSN		METTL7A	PI4KA	HSPA14
YIPF4	IMPACT		WNK3		PAXBP1	WDR1	GRM4
PITPNM3	CREBZF		RAPGEF2		SMG1	RSBN1L	DHFR
EPHB4	BCL2L11		GPR85		MOSPD2	ATG13	ADCYAP1R1
VPS4B	IRS1		ZFHX4		MEP1B	WBP1L	RPP40
CD47	BTBD3		TRANK1		MMP8	DLG4	ATG2A
CHD2	NAA30		ATG3		CUL1	MPP7	SSTR2
KMT2C	KBTBD8		ACAP2		AC079354.1	KHSRP	C9orf3
PHTF2	IFFO2		GUF1		ZMYM5	UBR5	ALG8
NFIA	NKRF		RCAN2		GCG	PTBP1	PRMT7
UNC80	ARRDC3		ZBTB7A		GTF2H2C	WBP2	NRXN3
TMEM33	SH2B3		PRKCE		HOXC9	EAF1	ERVMER34-1
TTPAL	MED13		MYO1E		VWC2	VEGFA	C1QTNF8
WDTC1	TSHZ3		ISL2		DDX52	WDR6	SNX21
CMTM6	OTUD3		MED14		IDH3A	TACR1	NDNF
IMPG1	NR3C1		DPH1		SPPL2A	ATP6AP2	NNMT
AAK1	UBR3		ZNF516		RABGAP1L	KLF4	RBM14
ARHGAP24	PAX3		KIRREL		BPI	FAM91A1	PPAP2B
PTBP2	MBNL3		NAMPT		CH25H	DMPK	UBE2J1
TRIM55	ABHD17C		SYNCRIP		FAIM	YPEL2	SH3TC2
FBN1	SLC7A11		MAPKBP1		FSIP2	FOSB	SRD5A1
PCDH1	ATP2B2		GPR158		TFF2	COL25A1	NUP37
SCN1A	GMFB		JARID2		DRAM1	UTRN	SHC3
BHLHE41	EFNA5		ZNF236		SENP5	RYBP	KCNG1
STARD13	PPARGC1B		EPHA2		CACYBP	RNF165	TBC1D10B
INSR	RALGPS1		VKORC1L1		HDGFL1	FZD7	TRAK1
CMTM4	PHF6		FAM168B		GMCL1	RNF150	KIAA0141
TRAF3	DYRK1A		UHMK1		C11orf87	GDF6	ELL
LZTS3	CALCRL		ANKIB1		KCNQ5	LRRC8A	KATNAL1
ESRRG	ASH1L		IGFBP5		TLR7	RSBN1	GNAS
SLC25A37	MLLT4		TSPAN9		RBM12B	CLOCK	NFATC2
ATP2A2	SLC6A17		TADA2B		TSHZ1	TAOK3	KLF9
RP1-170O19.20	RUNX1		SLC30A9		FAM19A2	EYA4	RGS19
FBN2	RNF44		SFRP1		ATP6V1A	CASK	UVRAG
ZBTB10	ABI2		CBX8		RP11-650K20.3	KLF13	B3GAT3
DUSP7	AGO3		SLC16A3		RSPH10B	FBXW7	KCNH1
LIN28B	C6orf62		CRIM1		ELAVL4	ZMAT3	CSDC2
FAM199X	KCNA1		HNRNPA3		LCP1	RARB	ATXN7L1
GIGYF1	DUSP16		SLC35A3		USP15	DGKZ	MMAB
TMEM87B	TRIO		STK39		SMIM18	TGIF1	OCIAD2
HOXA9	PPP2R5E		PHLDA2		QRFPR	ZNF146
ARHGDIA	LMO3		UBE2QL1		PARD6G	SLC25A25
SF3B1	ESRRG		G3BP2		HIBCH	NR1H3
FGF12	ABCA1		MGAT5		KPNA4	SLC24A4
OTUD4	REV3L		MYO9A		ABCA8	VAMP4
SRSF10	NANOS1		PLD1		SULT1B1	ZFP36L2
LEPROTL1	TM9SF3		FAM101B		BPIFA2	CTBP2
SOCS2	ARHGEF3		CCND2		LRRN4CL	MAP3K1
ZHX3	CBFA2T2		PANK3		FAM133A	CA8
ATRX	ELN		YES1		AFF2	MNT
KIAA1239	TBC1D14		BTAF1		KIF5B	PEA15
CAPN5	TANC2		UBN1		SHROOM2	SEC62
MKL2	WDR82		NRP2		HSPE1-MOB4	ARFIP1
TNIK	MEF2D		NAALADL2		QKI	TCF7L2
ARRB1	FAM222A		SLC38A2		CNTRL	OLFML2A
USP32	HIPK3		ASH1L		RAB30	PDPN
UCK2	FZD4		ZXDB		OR11A1	SMEK2
ZNF362	CTBP2		PAX6		ANAPC13	GIT1
FOXP1	PRKAA1		ADAR		DKK2	NFATC2
NFAT5	SEL1L		ZNF827		MCPH1	ELF1
DDX19B	ZSWIM6		DSEL		KCNQ3	HAND2
DNAJB1	RXRB		TNKS2		RUNX1T1	AKAP12
SPTLC2	SEPHS1		RALGAPB		LNX1	PHF6
SLC30A5	LGR4		TRIP11		RAB27B	RNF38
DMXL1	BRWD3		PLXNA4		CTNNA3	TNPO2
ACVR2B	PLEKHG1		C6orf120		ZFP36L2	LASP1
DAPK2	SCN8A		ACVR2B		ZCCHC24	TMCC1
STXBP6	CCNT2		AKAP11		CCDC18	TGIF2
ADCYAP1	SOCS5		RICTOR		POLR2K	SGIP1
LIN7A	MTSS1L		PLCG1		MTCP1	SLC8A2
NUP153	MTMR2		PAK3		LMOD2	HOXA3
HSPA4L	ZFAND3		ZBTB6		SLC16A4	MON2
ID4	NOG		SMARCC1		PPP3CA	AVL9
WDFY2	HEG1		ZIC4		KIAA2022	PTPN1
NIPA1	HNRNPF		PLEKHA1		KCTD14	HDAC4
WIPF2	GOLGA4		UBQLN1		IFI30	KIAA2022
ZC3H14	SLC4A4		TBX18		RPS6KA6	RAP1B
HIC2	LRRN1		ABCB7		MAP3K2	MAP1A
ZNF664	SLC1A1		NDST1		GABRA2	CCZ1
FOXK2	PTGFRN		DAAM1		KATNA1	SLC39A10
RTN4RL1	PROX1		DGKH		ALDH1A3	ATF2
SDC2	MYO9A		TEX2		CDC37L1	ARPC1A
FBXL19	KITLG		NFAT5		FMO2	PTPRA
BAZ2A	RAP1B		FAM210B		ZNF420	SLC7A2
PTPRT	KSR1		NCOA1		SLC25A18	KLHL15
SRGAP3	TP53INP1		SPEG		SORCS3	SLC35B4
SRPK1	SLAIN2		RORA		ATP6V0A4	CREB5
CALM1	MRGBP		ATP6V1B2		LILRB3	ACER2
EEF1A1	SEMA6A		NAALADL1		TMEM261	PRKACB
MCL1	SETD5		FUBP3		NSUN6	PGAM1
UNKL	CDH8		GDAP1L1		PABPC5	MUM1L1
PLEKHA3	PRKCE		TNPO1		PRNT	ANKRD23
HHIP	PAX5		KIAA1522		CLTC	MTSS1
LPHN1	HDAC9		SULF1		C9orf47	SEMA6D
ESYT2	SEMA6D		PLAG1		SOSTDC1	CPED1
ACAT2	ZNF638		ARHGEF3		FLJ45079	MPZ
FST	BCL9		SNX33		PSTPIP2	SLC16A12
MECP2	TCF4		METRNL		CELF4	KAT6A
MFSD6	ZNF746		ANKRD13C		SSR1	KCNJ2
BNIP3L	RORA		FAM126A		COX11	DNAJC5
MYH9	ATP8A1		WASF2		FOPNL	KAT6B
FOXN3	RAB5A		ABCA1		DLST	ZZZ3
ACTR1A	RREB1		QKI		TCTEX1D4	TGFBR3
PDE7A	MAML3		BICD1		OLFM3	GNAQ
CHD3	CTDSPL2		ZMYND11		AC104472.1	FAM168A
PIP4K2B	EMP2		PURB		KIAA1919	PTPN4
KIAA0232	TSPAN5		PARVA		FAM92A1	ZNF281
IP6K1	EFNB2		GOLPH3		RPF1	EPB41L4B
CTSV	DCAF7		GRK6		HRG	CAPRIN1
CSTF2	ZC3H4		PPP2R5A		CDH26	FNDC3A
WIPI2	NOVA1		TOMM70A		ZNF397	SLC8A1
DBNL	PDE7A		GLYR1		WRNIP1	SRGAP2
SPTY2D1	CXXC4		CDK9		AL138847.1	TTC7B
CEP128	MARK1		PAFAH1B1		CLEC12B	TEX30
SMARCD1	PAPPA		SOX6		GGT6	C20orf112
ZBTB20	CDC73		ATXN7L1		FAM199X	FOXP1
DDX3X	ANK2		TECPR2		SAMD12	SLC25A36
DLGAP3	UBN2		EFNB2		TENM1	AP3D1
CACNA1B	SLC19A2		RNF213		B4GALT4	ISY1-RAB43
FTL	RNF38		CXorf23		TBX20	TRHDE
KIAA0430	TOP1		RFX3		ETF1	UNC50
CCNT1	RAP2C		CELSR3		EDN2	WNT3
CSF2	PIP5K1C		RNF145		GIPR	ZNF217
SLC46A1	FRYL		DDX3X		SERPINB4	CREBL2
AGAP2	ANKS1A		PTAR1		TOB1	MGAT4A
RBBP4	TRAPPC8		CTNND1		FKBP14	MFSD9
VEGFC	ZBTB7C		FAF2		SLC1A2	WBSCR27
NPTXR	FLRT2		PEAK1		NIPA1	RIMS4
WDR81	ANTXR2		C1orf95		CD44	FRS2
FBXL20	NHLRC2		WHSC1L1		TSHZ2	ZC3H7B
ITPKB	RAP2B		DBP		VSTM5	HSP90B1
APPL2	MKL2		UBE4A		CAAP1	NECAB1
B4GALT2	ZNF704		ATXN2		SRSF2	CREM
RRAS	CREB1		ZFP91		NEK5	C17orf82
FKBP2	NR6A1		SLC7A6		L2HGDH	FAM102A
PLK3	PTPN9		KCNN3		PMAIP1	ATXN1L
RCL1	AGFG1		SP1		MTRR	DNAJC13
SRRM4	BRSK2		HACE1		UBE2Q1	MAGI2
EFEMP1	FAM199X		HECW2		PLCXD3	JOSD1
COL5A3	FBN1		TRIM27		MPHOSPH8	KCND3
COX8A	MITF		CPSF7		GLIPR1	ACPL2
ODC1	KPNA6		RAD54L2		C6orf62	HIVEP3
KIAA0040	FBXL3		PDE7A		SLC25A13	PHLPP2
CTD-2116N17.1	LARP4B		FN1		CISD3	GLCE
PAPPA	PAPPA2		PREX1		CERKL	MED1
INO80D	SIX4		KDM5C		ABI1	TRPS1
AZIN1	KCNC4		SNX2		LAYN	SMAD9
GEMIN6	ACVR2B		HIVEP2		RSRC2	BCL7A
G6PD	PDS5B		PGR		CXorf56	MEIS1
DNM2	CREBRF		ATG14		HIF1A	NPAS3
SYDE1	ZFHX4		WIPF2		EGF	PPTC7
ANGPTL4	ARHGAP5		HP1BP3		HSD11B1	DDX17
RNF26	CRTC1		SLC31A1		ST7	ZBTB4
FURIN	MAP3K9		FNDC3B		LRP12	RNF40
RNF44	ASAP1		FOXD3		ACSL6	PDRG1
OSBPL8	PIK3C2B		NEDD4L		ZNF75A	ACTB
SOX11	ICK		DONSON		LRRC17	CD2AP
MYCBP2	SNAP91		DCP2		CEP135	CCND1
PCDHGB3	ECE1		VGLL4		GABRR1	SASH1
PCDHGB4	PURB		DGKI		RNMTL1	CCZ1B
QPCTL	CCDC88A		SUZ12		NKX2-2	DGKG
SH3GL1	RGS16		EPC1		CNR1	SFXN5
FAM118A	MGAT5		PHC2		PTGFR	PCDH17
PCDHGA11	SFRP1		EML4		XRCC6BP1	CSF1
PCDHGA1	SREBF2		HECW1		ABCB5	SETBP1
PCDHGA5	UNC80		PTPRD		LMO7	PDCD4
PCDHGB2	TET3		PPM1L		TEAD1	GXYLT1
PCDHGA4	NAV3		NCOA3		SNX25	GNPTAB
PCDHGA2	TNRC6A		RBM26		MAT2B	HIPK3
PCDHGB7	FAM53B		ALX1		MED30	DLG2
PCDHGA10	CEP170		TMEM120B		VDAC2	AKAP13
PCDHGA6	TSHZ2		RBM27		DCAF12L1	RAP1A
PCDHGB6	UHMK1		CASKIN2		FAM81A	CTNND2
PCDHGB1	WDFY3		ARIH1		ZNF606	STAG2
PCDHGA3	NFIA		IPO8		CLDN22	NOTCH3
PCDHGA9	ERBB4		IL6ST		TMCO3	CBL
AVL9	PDE4D		SMG1		ARL11	FRAS1
TFAP2A	LRIG2		ARF4		AKAP7	SLC39A9
PCDHGA8	DSTYK		CENPP		CXCL12	TRIM44
PCDHGA12	ROBO2		C2orf68		CISD2	PMEPA1
PRRX1	PYGO1		EBPL		XPC	CALM1
PCDHGC4	FBXW7		LEF1		AGMO	DLG1
PCDHGA7	LMTK2		KCTD10		STK38	PTPRJ
PCDHGC3	NSD1		SIM2		LYPLA1	G3BP1
PCDHGC5	TAL1		SRSF3		MSH6	GNPNAT1
GAPVD1	SH3PXD2A		OSBP		TNFSF8	TFE3
ACAN	PUM2		ASH2L		C11orf34	WASL
RAB34	TBL1XR1		RGP1		RBM44	AGO1
SMEK2	BMPR1B		TNFAIP8		TSPEAR	HNRNPA1
SMARCE1	ADAMTS15		NADK		LAMP2	ZADH2
NCKIPSD	DLC1		HIC2		ZBTB7A	MAP4K3
SPINT1	FGFR1OP		YWHAB		EXOSC1	ASXL3
LUZP1	DOCK3		NRP1		TROVE2	RSF1
KIAA1199	ITGA8		MYLK		EAF2	NGFR
RAB11FIP1	TRIM71		KIAA1462		GBAS	NUCKS1
PDZD3	TENM3		PHAX		DUSP22	VEZF1
TGIF2	PNRC1		DNMT3A		IL1RL2	THRB
TPI1	ELFN2		GTF2B		B3GNT8	CBX6
SETD8	TCF21		POLDIP2		SMIM21	BSN
SRSF2	SLC8A1		DBNL		ZBTB41	WNK3
CTTNBP2	XKR6		ELOVL6		RWDD3	RAPGEF2
DLST	AFAP1		RNGTT		MURC	GPR85
MOB3B	KIAA0232		NT5C2		FAM179B	ZFHX4
GLYR1	MMP15		EIF4E		KCND2	TRANK1
NME1	NACC1		NINJ1		SAMD5	ATG3
PRDM10	ZNRF2		MXD4		ZNF853	ACAP2
NUMA1	RAD54L2		SRC		CLNK	GUF1
PAPSS1	UBR1		MAP4K2		NFIA	RCAN2
ZC3H10	SMARCA4		TRA2B		NPAS3	ZBTB7A
AKAP10	UBE2A		ANXA4		ASXL3	PRKCE
JDP2	EIF5A2		SMIM2		HOMER1	MYO1E
SEC63	FAM168A		HMGCR		PTP4A2	ISL2
SNX18	SOX6		NCL		HTR5A	MED14
OTX1	FRS2		CYB5B		NAALADL2	DPH1
HMBOX1	LIFR		SPATS2L		CHRM2	ZNF516
DHCR24	MED12L		ABI2		PGM2L1	KIRREL
ACLY	BLOC1S5		IL1RAPL1		ZNF445	NAMPT
STK3	TRIM44		TMEM72		PLXDC2	SYNCRIP
C10orf113	CDK19		RFFL		TES	MAPKBP1
SLC35A4	TAB2		BRIX1		MATR3	GPR158
GANAB	ZNF24		ITGB1BP1		SAMD1	JARID2
CDC42	NFIB		RAD51L3-RFFL		PPAP2B	ZNF236
FLOT2	NR1D2		CRISPLD2		PIN4	EPHA2
ZNF462	SPRED1		IGFBP4		SLCO5A1	VKORC1L1
LMOD1	TSC22D2				ADCYAP1	FAM168B
BEST3	NOL7				KLRC4	UHMK1
VCP	FIGN				PPARG	ANKIB1
CCDC117	BICD2				STAU2	IGFBP5
GALNT6	DIP2B				TMEM106B	TSPAN9
ZDHHC8	VEGFC				TFEC	TADA2B
PPP2R5D	TNRC6B				MS4A3	SLC30A9
TNNI1	RBM12				IL2RA	SFRP1
PAX2	CDH6				ZNF146	CBX8
MINK1	ATP1B2				ARL6	SLC16A3
MAFG	RBM25				ZNF654	CRIM1
CACNG4	PPFIA4				PCMTD1	HNRNPA3
ZNF335	IDH2				HSF4	SLC35A3
SOCS5	STAT6				ZMAT1	STK39
ARHGEF2	BEND3				TPTE	PHLDA2
RRAGD	CUL4B				PATE1	UBE2QL1
SECISBP2L	SIN3A				CLEC4G	G3BP2
ATOH8	SOS1				TMEM155	MGAT5
ABCA3	GLG1				PLOD2	MYO9A
FAM134C	ATP2B1				CALCA	PLD1
CTC-432M15.3	DYRK2				GK	FAM101B
ST13	KAT7				TDRP	CCND2
CDR2L	FAM179B				ANKRD12	PANK3
SLC25A25	TMBIM6				RNF217	YES1
BACH1	HNRNPU				SHOX2	BTAF1
BSN	GSK3B				DKFZP779L1853	UBN1
NAA40	LSAMP				OGDH	NRP2
SLC2A12	LANCL3				ADAM28	NAALADL2
KLHL17	PRDM16				TTC4	SLC38A2
KCNK3	MET				CBR1	ASH1L
RAPGEF6	HIVEP3				AGPAT5	ZXDB
KLHL42	GABRB2				TMEFF2	PAX6
ERBB2	TNRC18				RMND5A	ADAR
FAM134B	NRK				PRDM6	ZNF827
SREK1	SYNGAP1				SLC7A3	DSEL
BAI1	KDM6B				LRRC4	TNKS2
SPPL3	CEBPA				C15orf53	RALGAPB
SASH1	ZNF618				PBOV1	TRIP11
EIF5A	MLEC				GPR150	PLXNA4
ADAMTSL4	ZNF469				CCL4L1	C6orf120
DLG5	WDFY2				LRRC58	ACVR2B
SHISA9	SOCS7				ELOVL4	AKAP11
ZFP91	PKNOX1				PLAG1	RICTOR
NOS1AP	FAM84A				TIGD4	PLCG1
IL6ST	KCTD10				TMEM245	PAK3
TRAM1	ATAD2B				TAC1	ZBTB6
FRMD5	DIP2C				BRD3	SMARCC1
DIP2B	SMOC1				TMEM54	ZIC4
SPRED3	ZFHX3				WNT2	PLEKHA1
SEMA4B	HEY2				INPP5B	UBQLN1
KIAA2018	KDM6A				CLIP1	TBX18
SEC24A	SOCS2				TXLNG	ABCB7
GZF1	HAT1				TINF2	NDST1
PACSIN1	ATRX				CA8	DAAM1
CTNND1	DMD				SMIM13	DGKH
TRIOBP	MYO1E				TMEM200A	TEX2
ELMSAN1	FTO				IL12A	NFAT5
CAMK2G	STX7				MEPE	FAM210B
USP2	C11orf30				ADAMTS8	NCOA1
CREBZF	EMP1				FAM65A	SPEG
ACSL4	TSR1				MYBPC1	RORA
TNK2	DNMT3A				ZDHHC23	ATP6V1B2
SERTAD2	PAPD5				TTC14	NAALADL1
RASGRP3	PLEKHG3				CDCP1	FUBP3
GRAMD1B	VLDLR				CUL3	GDAP1L1
GRIN2B	EMC7				SPOPL	TNPO1
AMOT	JDP2				OSTM1	KIAA1522
RAB14	JAKMIP2				RBM19	SULF1
SMEK1	ARFGEF1				CDKL2	PLAG1
SPOCD1	WEE1				KLHL22	ARHGEF3
TIMM8A	GET4				AXDND1	SNX33
RNASEH2C	CADM1				WNK3	METRNL
RANBP2	STMN1				TEX36	ANKRD13C
CLTC	SOX11				C7orf13	FAM126A
AGO1	USP31				PGR	WASF2
NCOA5	NUFIP2				CRYZL1	ABCA1
C6orf132	SMARCA5				MAPK14	QKI
SLAIN2	ZBED4				FBXL17	BICD1
TBC1D12	SIK2				CHURC1	ZMYND11
STT3A	MFN1				CCRN4L	PURB
KHNYN	BNC2				MBNL3	PARVA
DNAL1	TRDMT1				KIAA1324L	GOLPH3
CALML4	PLAT				MRPL16	GRK6
SRSF7	CYB5B				EAPP	PPP2R5A
RP11-315D16.2	ZBTB20				ST7-OT4	TOMM70A
FUT4	CCNK				KIAA0825	GLYR1
STRN	GPR174				AL590452.1	CDK9
CDKN2AIP	TANC1				TAB3	PAFAH1B1
RNF126	GATSL2				POU6F2	SOX6
MPHOSPH9	SESTD1				ZDBF2	ATXN7L1
SLC25A10	FOSL2				NFASC	TECPR2
	KLF3				RAD54B	EFNB2
	DACT3				RFX7	RNF213
	RPA1				MACROD2	CXorf23
	OSBPL1A				STXBP5L	RFX3
	EBPL				TACR3	CELSR3
					ASB7	RNF145
					ZC3H12C	DDX3X
					CPEB4	PTAR1
					SCD	CTNND1
					GOLPH3L	FAF2
					DNAJB14	PEAK1
					ELTD1	C1orf95
					HMGA2	WHSC1L1
					AC007390.5	DBP
					VEGFC	UBE4A
					CHODL	ATXN2
					MOB1B	ZFP91
					UPF3B	SLC7A6
					MED17	KCNN3
					PAIP1	SP1
					ARMC4	HACE1
					SLC14A1	HECW2
					TMED5	TRIM27
					PHIP	CPSF7
					FAM160A1	RAD54L2
					SKIL	PDE7A
					STON2	FN1
					SCOC	PREX1
					DNAJA4	KDM5C
					XPO4	SNX2
					CDS2	HIVEP2
					TDRD5	PGR
					CD302	ATG14
					SEMA6A	WIPF2
					ERH	HP1BP3
					TULP4	SLC31A1
					ANGPTL1	FNDC3B
					DMXL1	FOXD3
					FAM20A	NEDD4L
					CHL1	DONSON
					DIAPH1	DCP2
					MAFB	VGLL4
					POU2F1	DGKI
					IKBIP	SUZ12
					MYBL1	EPC1
					NTN4	PHC2
					TPH2	EML4
					RP11-17M16.1	HECW1
					NARS	PTPRD
					VPS26A	PPM1L
					DENND5B	NCOA3
					RRAGA	RBM26
					CDK17	ALX1
					ANGPT1	TMEM120B
					KLF12	RBM27
					NKTR	CASKIN2
					AKTIP	ARIH1
					POU2AF1	IPO8
					CLEC1A	IL6ST
					LRP1B	SMG1
					ZBTB6	ARF4
					PTPN22	CENPP
					HMGCS1	C2orf68
					PLN	EBPL
					RSRC1	LEF1
					TOX3	KCTD10
					SLC4A10	SIM2
					KRT76	SRSF3
					GLT6D1	OSBP
					REV3L	ASH2L
					RP11-192H23.4	RGP1
					MCF2	TNFAIP8
					CSGALNACT2	NADK
					STX16	HIC2
					NAPG	YWHAB
					OTUD4	NRP1
					ELAVL2	MYLK
					CXCL9	KIAA1462
					HDC	PHAX
					GYS1	DNMT3A
					CHST9	GTF2B
					CDC14A	POLDIP2
					ANKRD26	DBNL
					YME1L1	ELOVL6
					IKZF2	RNGTT
					NIN	NT5C2
					COPS2	EIF4E
					RC3H1	NINJ1
					GPR85	MXD4
					FIGN	SRC
					ZNF449	MAP4K2
					PTGER3	TRA2B
					TMTC1	ANXA4
					HOXC8	SMIM2
					FMO1	HMGCR
					WWP1	NCL
					PDPK1	CYB5B
					LPP	SPATS2L
					CTNNA1	ABI2
					KCNH5	IL1RAPL1
					TM2D1	TMEM72
					RNGTT	RFFL
					CD46	BRIX1
					SIX1	ITGB1BP1
					TBC1D23	RAD51L3-RFFL
					HTR7	CRISPLD2
					FAM46D	IGFBP4
					IL10RB
					NPHP3
					CACNA2D1
					MAGEC1
					NDFIP1
					XBP1
					PPP1R3A
					EHF
					CLVS1
					FAM63B
					RET
					PRRG3
					SYT4
					HOXA13
					ZNF638
					NHS
					GPM6B
					FAM124A
					KCNV1
					GABRA4
					PAK7
					IL1RL1
					C22orf46
					FAM46A
					CA10
					UNC80
					NRIP1
					INO80D
					GRIN2B
					RAG1
					DACH1
					ASB14
					PSD3
					RAB33B
					STC1
					RREB1
					ZBTB18
					PALLD
					EPHA7
					SAMD8
					ATG3
					PURB
					DNM3
					C13orf35
					PGAP1
					SLC9A2
					SLC44A5
					ERC2
					AMOT
					BRWD3
					TBL1X
					MALT1
					RBL2
					CDK14
					POC1B
					PGGT1B
					FAM19A5
					RALYL
					PITX1
					GLRA3
					SEPT10
					AL589765.1
					ANKRD44
					SLC17A3
					PRPH2
					CROT
					SLCO3A1
					PER3
					AC112693.2
					RUNX2
					PCYT1B
					FUT4
					P2RY10
					RNF152
					SUV39H2
					G2E3
					RNF128
					PLEKHA8
					SLC36A4
					ZBTB10
					PAK3
					ARID2
					RPUSD4
					IL22
					SLC16A14
					UBXN4
					ZNF398
					LRPPRC
					MPLKIP
					HECW2
					COL4A3BP
					RNF14
					KIF5C
					EPS8
					ZIC3
					C11orf30
					OIP5
					LRRC8B
					PDE3A
					PANX3
					AGTR2
					TMEM196
					AC011897.1
					C2orf47
					PLCL1
					CSN2
					PAPPA
					KIAA1147
					FZD6
					MDFIC
					ITGB3BP
					HIST1H2AE
					TSLP
					MFSD8
					CD28
					AMMECR1
					TM4SF4
					UBE2D1
					ONECUT2
					MKX
					STK17B
					PTEN
					FASTKD3
					POU3F3
					CDC40
					AC015987.2
					TCF4
					GREM1
					EGFR
					CAB39L
					FAM204A
					PHACTR2
					GAD1
					VEGFB
					TSGA10
					CNGB3
					CRH
					POLR3F
					DYNAP
					MYCT1
					AHR
					ARID4B
					PRDM5
					CNTN1
					TIMP3
					SYNC
					NT5DC1
					MIB1
					DST
					SEC11A
					ATP1B4
					OR13A1
					SEMA3G
					SLC24A2
					C4orf40
					VPS13C
					CNOT6L
					CNNM1
					PLEKHA2
					SYT10
					KCNJ10
					LRRC55
					TMEM132B
					KCNJ6
					KCND3
					TAL1
					KLF7
					KCNJ3
					TNFSF15
					LIN28B
					IMPG1
					HTR2C
					LRRTM3
					SIM1
					RASGEF1B
					SGK494
					LMOD3
					DNAJB4
					PRRT3
					RP2
					KLHL13
					ZFP3
					PLXNA2
					CASC10
					PALM2-AKAP2
					ANK1
					FUBP1
					TRIM23
					AKAP2
					C1orf43
					RLIM
					KMT2A
					JAKMIP2
					F2R
					DBT
					TMEM178B
					CREBRF
					CARS2
					KLHL20
					CPEB1
					HOXA5
					SYTL4
					CYS1
					GJB2
					RYR2
					ZNF503
					ITGB8
					TCEAL8
					ARL5A
					ABCB10
					RDH11
					FGD4
					UQCRFS1
					SGCD
					GPC6
					TMTC2
					MKRN3
					HEATR5B
					MARCH11
					SPRR2B
					GPR98
					CD200
					MSANTD4
					SEMA5A
					PDK3
					FMN2
					NRAS
					STEAP2
					LCOR
					ZBTB26
					NAMPT
					SNRNP200
					CEP290
					TMTC3
					GALNT13
					PIWIL4
					TMEM208
					TAOK1
					UBN2
					CCDC88A
					EIF3J
					RICTOR
					FAM96A
					PARP8
					HERC3
					HECW1
					HDX
					KIAA1456
					BICD1
					YPEL2
					MYCBPAP
					MED14
					ASB9
					PLSCR4
					ZMYM6NB
					C9orf152
					MAGEE1
					ZC2HC1A
					ODF2L
					GAN
					FSBP
					UBTD2
					TMEM47
					SULF2
					ZDHHC13
					ATP5E
					CYP7B1
					N4BP2L2
					RAB8B
					PTPN4
					PYHIN1
					RARB
					CARD6
					C19orf43
					SOGA3
					BTF3L4
					H2AFY
					TBC1D4
					PCDH9
					CLIP4
					LENG1
					BRS3
					C4orf36
					USP27X
					PDIK1L
					ZNF804B
					DDX3Y
					PPM1E
					NECAB1
					ENAM
					CYBRD1
					GUCY1A2
					KPNB1
					VTA1
					ZNF280D
					HS3ST1
					GUF1
					RAB1A
					FAM46C
					XKR6
					DMP1
					MSH4
					GLRB
					MBLAC2
					EPT1
					TOX4
					PRR5L
					CREBBP
					SREK1
					DEPDC1B
					GPR180
					PGRMC2
					HINT3
					TTC33
					FMR1
					RAB22A
					MARCH7
					PTGS2
					VDR
					A1CF
					SYT9
					LBH
					KDM5B
					RASGRF2
					CPNE3
					FAM150A
					RASGRP3
					KCNH7
					JHDM1D
					IGF1R
					USP44
					CCSER2
					FAXC
					RP11-863K10.7
					PHLDB3
					PAX8
					PSD2
					PRPF40A
					IRX2
					STXBP4
					MEX3A
					NUP62CL
					AAK1
					PRLR
					ONECUT1
					TMEM126B
					MORN3
					CAST
					LPAR1
					NPY2R
					WNT5A
					PFKFB2
					ZNF711
					JMY
					HMGCLL1
					NMUR1
					NRXN3
					PTPRC
					ATP10D
					RNF165
					ZYG11B
					SLC11A1
					GPR158
					TNR
					PRDM10
					CPED1
					PLD5
					C3orf70
					LRRTM2
					ALDH1L1
					SORBS1
					FZD7
					CAMK2A
					ARID5B
					KCNB1
					KCNC1
					CASC4
					CFTR
					TRUB1
					OPHN1
					EGR3
					ERBB2IP
					ATRNL1
					CCDC152
					SLC35E2B
					PEX5L
					NR3C2
					ATRN
					ZPLD1
					ACPP
					GRIK2
					SHISA9
					SGMS1
					BTBD11
					ST8SIA3
					PRKG1
					CCNJ
					EYA1
					C12orf79
					PAPOLG
					SOX4
					ZDHHC15
					SCARA3
					LRP11
					ASPH
					SYT11
					ZCCHC7
					FRAT2
					MAK16
					EDEM3
					KIAA1244
					PDP1
					TTC39B
					HIATL1
					SEMA3C
					AMDHD2
					PKN2
					HFE
					ITGAV
					NCOA7
					HIPK1
					NAP1L1
					FBXO28
					MED4
					FAM98B
					TOX
					SCYL3
					ZNF655
					CHD9
					TTLL9
					PINX1
					FAM129A
					PHF17
					MAGT1
					ZBTB21
					HOXD9
					RANBP10
					TBX18
					STRN
					TNRC6B
					KITLG
					RHOU
					SALL4
					SLC9A6
					ESCO1
					GABRG2
					RGS16
					FLRT3
					RWDD2A
					CDK13
					TMEM161B
					SMC6
					AMER2
					SNX16
					PCDH20
					PPARA
					C5orf24
					VASH2
					MED1
					FRK
					SMARCE1
					PPP2R3A
					GTF2H1
					CNTN4
					TWF1
					AGPAT4
					SCAI
					MSL2
					CASC5
					HDAC10
					SLC16A7
					MAB21L1
					DOCK4
					XIAP
					NEDD4
					FKTN
					BMI1
					MME
					FBXL4
					CREB5
					GMPS
					PIGA
					MBNL2
					BACH1
					MED13
					IFIT2
					C22orf31
					EPS15
					CYP3A5
					SCG2
					AP005482.1
					ZBTB7C
					PLEKHA1
					C21orf62
					TNFSF11
					RAB36
					TMEM200B
					EPB41L3
					TEX30
					HELLS
					RP11-867G23.8
					VKORC1L1
					KIAA1430
					ZNF582
					CDK19
					SMIM19
					CXorf23
					CDC5L
					ATXN7
					PARVA
					DPYSL3
					ZNF207
					C1orf21
					SMIM15
					SPTBN2
					NCOA5
					MINA
					CARF
					SLC6A14
					TRPC3
					CYP7A1
					IFIT3
					SPRED2
					AGO3
					PDE6D
					CCDC171
					MUC20
					ATPAF1
					LMO4
					HNRNPUL2
					SETX
					TOM1L1
					DIAPH2
					FGD6
					C11orf73
					B3GNT1
					HLCS
					COL1A2
					FAM115C
					FAM98A
					SMEK2
					ATP6AP1L
					CCDC85A
					DFNB59
					ATG12
					SKIV2L
					SP1
					ENDOD1
					CAMK4
					PDS5B
					UBE2V2
					GDF7
					SOCS6
					FAM208A
					DR1
					STX2
					TMEM87B
					CREBZF
					WDR89
					RBM12
					FHL5
					DPYS
					C9orf57
					CCNT1
					NOS3
					OGN
					MBTD1
					FBN1
					PPARGC1A
					RAB5A
					THRB
					FLJ27365
					GALNT1
					UBE2H
					UNC5D
					PPP4R2
					COMMD3-BMI1
					KLF3
					SNX9
					MTF1
					CISD1
					PRKAA2
					RGS17
					RP11-126K1.2
					PCGF3
					ABCB7
					RBM7
					ATG4C
					LGR4
					VCPIP1
					ARMC1
					OTUD6B
					PCNX
					ITGB6
					RASSF4
					C2orf73
					HTR2B
					MAGI1
					UEVLD
					EFCAB11
					C4orf32
					PHEX
					NKAP
					TMEM55A
					ASTN1
					CLVS2
					NAV1
					RAP2B
					SYNJ2BP
					MCM4
					ZNRF3
					YTHDF3
					CCNY
					SNTB2
					KRAS
					ZBED6
					NEO1
					FA2H
					FAM198B
					PTPDC1
					FEM1C
					COL10A1
					SLC44A1
					GORAB
					ROCK2
					SUCNR1
					DGKH
					ECM2
					PTCHD1
					ID1
					IGF2
					MMACHC
					THSD4
					C1GALT1
					USP38
					PTPRD
					REST
					PPARGC1B
					LIPT2
					SPAG6
					BNC2
					PTPN3
					PUM2
					LDOC1
					MIS18BP1
					IQCC
					KCTD3
					RP11-169F17.1
					HMGB3
					SLC5A12
					HABP4
					MKLN1
					EML5
					MSI2
					FBXO30
					LPGAT1
					TMTC4
					C6orf89
					LHX9
					SUGT1
					TMEM56
					SLC31A2
					TSC22D2
					TNKS
					EEA1
					PGM2
					VAPA
					PTAR1
					SSTR1
					GRIN3A
					ATP10B
					ABCA3
					TMEM260
					ESR2
					CYP26B1
					C14orf39
					GPR83
					TMEM132D
					SLC26A2
					SYT1
					FOXL2
					SLC2A2
					SDR16C5
					RIMS1
					IGLON5
					CHD2
					LNX2
					WDR60
					ZNF697
					HLA-DRB5
					RHPN2
					PLXNA4
					KIAA1045
					ZNF667
					CELSR1
					UVRAG
					SUSD5
					CRY2
					CMTR2
					AC005609.1
					PHF16
					FRY
					GATA2
					DGKB
					RPGR
					GPR12
					NRP2
					CD93
					CCR3
					SNX12
					CNTN5
					ZDHHC17
					AQP9
					CACNA1E
					SYTL5
					MCOLN2
					LRP4
					KIF3B
					SLC24A4
					MFSD4
					FIZ1
					AGBL2
					FNIP1
					ASAH2
					IDO2
					ARHGEF38
					SLC26A7
					ZCCHC14
					AC012215.1
					SLC19A2
					ANO6
					RSAD2
					AIDA
					SH3RF2
					LRP2BP
					FZD4
					RSPRY1
					FCGR3B
					LRGUK
					SLC8A3
					KCNT2
					NAA60
					ETV3
					SLC16A12
					LGSN
					HLTF
					DLGAP2
					JMJD1C
					SDK2
					TRPV2
					ZFP91
					APOLD1
					PI15
					NCOA2
					CYFIP2
					ANKRD13C
					USP51
					KCTD18
					NAV3
					PTPRN2
					LACC1
					SSTR3
					TMEM181
					RIC3
					DSCAML1
					TMEM117
					COL17A1
					WDR26
					HIVEP1
					AKAP10
					CBL
					GABRB2
					CIITA
					ZNF182
					RAPGEF4
					RAD51B
					TMEM42
					SLC38A11
					BICC1
					SLC5A7
					NRXN1
					C1orf147
					NCKAP1L
					EXOC8
					LCP2
					ATP8B2
					BMP8B
					TMEM255A
					SLC24A1
					SECISBP2L
					GULP1
					EAF1
					ELMOD1
					CDH4
					APLNR
					NPTN
					PCDH17
					HPCAL4
					MICU3
					FRS2
					TENM2
					LRCH1
					DEPDC1
					CPXM2
					HSF5
					USP34
					ELAC1
					GPR171
					NRK
					ZIC2
					ELMSAN1
					PCDHB16
					SOX2
					PAX2
					PACS1
					ZNF25
					AMPD3
					GIGYF1
					ERGIC2
					BLZF1
					FAM83F
					CHRDL1
					AJAP1
					ANKRD10
					RPS6KB1
					FCGR3A
					SLCO4C1
					WDR52
					EIF1AX
					PRKRIR
					SNED1
					NINL
					HELZ
					NR2F2
					MLLT3
					CDS1
					SKI
					MICAL2
					ZRANB2
					RASSF8
					IPO8
					MAP2
					LRBA
					APPL1
					ATP2A2
					HECA
					CCNE2
					TGOLN2
					ZKSCAN8
					NR6A1
					PTGFRN
					MFAP3L
					EPN2
					MCAM
					MLTK
					STIM2
					PURA
					OTUD1
					PP13439
					TCF7L2
					STX17
					AP5M1
					BAALC
					ATOH1
					RFX6
					TRIM6
					BMP2K
					ARFGEF2
					GZF1
					RAB11FIP2
					PTPRG
					H2AFZ
					RFX3
					SLC6A6
					AFTPH
					MANEA
					AMT
					CLCN4
					SH3KBP1
					KLHL42
					CDK12
					USP45
					B4GALT6
					HOOK1
					ZMYM2
					CADM4
					SCML1
					FZD3
					CACNB4
					CYB5D1
					DNAJA2
					MR1
					BACH2
					ESCO2
					ATP8A1
					MITF
					ELL2
					FAT3
					ZNF790
					DERA
					PIWIL1
					ZNF516
					MEIS2
					C3orf14
					GLYATL3
					CDC73
					PLG
					MLLT4
					ZBTB16
					MIOS
					GATAD2B
					NRG1
					CD109
					THBS2
					ELOVL2
					COL8A1
					LPHN2
					SRGAP1
					DCBLD2
					PEAK1
					ARID4A
					SEMA3D
					PIK3C2A
					CHCHD7
					LINGO1
					ZFP37
					CSTF1
					PTGER2
					SLC30A7
					COL4A4
					TM7SF3
					FAM134B
					PHF20
					PTPN14
					ACOT12
					SOCS4
					DCHS2
					NAPRT1
					POGZ
					ENAH
					PTP4A1
					LNPEP
					AMMECR1L
					SLC15A1
					CYP4V2
					NAPEPLD
					TMEM156
					DUSP8
					HOOK3
					NUFIP2
					DNAJA1
					ZNF558
					PALM2
					CHIC1
					SYT14
					PTGDR
					CTNNBIP1
					MRO
					NAA25
					PIPOX
					FAM169A
					FKBP1A
					CYP39A1
					C1orf185
					IFI16
					RND3
					F8
					ZDHHC21
					PCGF5
					RANBP1
					TMOD2
					MAP3K7
					NLK
					HAS2
					FAM76A
					RBM28
					SRPK2
					ASXL2
					RIMKLB
					TTYH2
					CSTF2
					CTIF
					AGXT2
					MRPL18
					PYGO1
					MAP3K9
					C11orf52
					PCCB
					RORA
					ACAP2
					KIAA1462
					TBC1D9
					SH3GLB1
					FAM60A
					MEX3C
					CTSF
					ABCA12
					LDB3
					UGT1A3
					RBMS1
					PLEKHF2
					RNF138
					SAMHD1
					NRCAM
					API5
					ETV1
					TCTEX1D1
					SORL1
					LPCAT2
					KIAA1715
					MICALCL
					TBC1D30
					IREB2
					BNIP2
					DYM
					SH2D4A
					TCF24
					AL163636.6
					RRM2B
					MMS22L
					PUS7L
					UGT1A5
					PEX12
					HEPACAM2
					SBSPON
					UGT1A9
					CALD1
					SHQ1
					UGT1A4
					UGT1A7
					UGT1A6
					KCNA4
					MBNL1
					IKZF5
					DPY19L4
					C6orf223
					ARL13B
					GNB1
					SP9
					NADK2
					FAM49A
					EIF3H
					GPR137C
					ALB
					RNF2
					SHC4
					CD58
					ITGA8
					SLFN5
					SEPT7
					KAT2B
					UGT1A8
					LZIC
					AC107021.1
					CDC27
					KCNAB1
					CCDC25
					ZNF704
					C11orf57
					TWIST1
					CHAMP1
					NCAM2
					SP8
					PIK3R1
					RAB7L1
					SGCB
					NCAM1
					CEP104
					FAM84B
					MYCBP
					TMEM200C
					DDX20
					TP53INP1
					ZNF597
					TMEM164
					BCL2
					FEM1B
					RFTN2
					MTMR9
					ADAMTS17
					EPSTI1
					DARS
					STAU1
					WDHD1
					MAPK6
					UGT1A10
					PLEKHM3
					SYBU
					DCUN1D3
					SLC30A1
					DSEL
					PDE5A
					IGF2BP1
					IRAK1BP1
					ADAM22
					ZNF780A
					POU4F1
					CBX5
					ZNF384
					MED12L
					NUDT11
					BRWD1
					ASAH1
					VGLL3
					SLC25A24
					SLC22A3
					ARL4A
					KCTD9
					KIAA1549L
					ZNF780B
					NEUROD6
					CD200R1
					UGT1A1
					DOCK7
					SERPINB13
					AK7
					KLLN
					NMNAT3
					RBBP9
					SCAMP1
					EVA1A
					SLC7A1
					SON
					SSBP2
					HHIP
					MYO6
					PPP2R5E
					ARHGAP17
					STRAP
					SOX11
					EGLN1
					KLHL11
					U2SURP
					FSTL4
					CAMSAP2
					B3GALTL
					TPK1
					OPN3
					S1PR1
					ACSS3
					YRDC
					EIF4E3
					TOR1AIP2
[truncated: 2,687 more rows]

## Sheet: Table S4
Table S4. specific expression of miRNAs for sequencing
Expression of miRNAs were achieved by normalizing read counts to RPM
mirna	NC-1	NC-2	GAA-1	GAA-2
miR-195b	0.686312	0.276569	0	0
miR-3091-3p	0.491709	0.276569	0	0
miR-802-3p	0.266703	0	0	0
miR-6966-3p	0.266703	0	0	0
miR-760-3p	0	0.276569	0	0
miR-1298-3p	0.266703	0	0	0
miR-137-3p	0.491709	0	0	0
miR-7073-5p	0.266703	0	0	0
miR-365-1-5p	0	0.276569	0	0
miR-7075-3p	0.266703	0	0	0
miR-7118-5p	0	0.276569	0	0
miR-217-5p	0	0.276569	0	0
miR-6955-3p	0	0.508553	0	0
miR-7651-3p	0	0.276569	0	0
miR-6917-5p	0	0.276569	0	0
miR-7658-5p	0.266703	0	0	0
miR-1963	0.491709	0.276569	0	0
miR-7069-5p	0	0.276569	0	0
miR-410-3p	0	0.276569	0	0
miR-1298-5p	0	0.708349	0	0
miR-7664-3p	0.266703	0	0	0
miR-6937-5p	0.266703	0	0	0
miR-6988-3p	0	0.276569	0	0
miR-5620-3p	0	0.276569	0	0
miR-7071-3p	0.266703	0	0	0
miR-7667-5p	0.266703	0	0	0
miR-7063-3p	0	0.276569	0	0
miR-5619-3p	0.266703	0	0	0
miR-1934-3p	0	0.508553	0	0
miR-3097-3p	0.266703	0.508553	0	0
miR-5119	0.266703	0	0	0
miR-6946-3p	0	0.276569	0	0
miR-7022-5p	0	0.276569	0	0
miR-141-5p	0.266703	0	0	0
miR-1b-3p	0	0.276569	0	0
miR-7225-5p	0.266703	0	0	0
miR-7013-5p	0.266703	0	0	0
miR-463-3p	0	0.276569	0	0
miR-3064-5p	0.266703	0	0	0
miR-6935-5p	0	0.276569	0	0
miR-1258-3p	0.686312	0.708349	0	0
miR-5626-3p	0.491709	0	0	0
miR-3103-5p	0.266703	0	0	0
miR-3101-5p	0.266703	0	0	0
miR-6967-3p	0.266703	0	0	0
miR-3100-5p	0	0.276569	0	0
miR-7678-3p	0.266703	0	0	0
miR-874-5p	0	0.276569	0	0
miR-7652-3p	0	0.276569	0	0
miR-380-3p	0.266703	0	0	0
miR-1249-5p	0	0.276569	0	0
miR-219a-2-3p	0.266703	0	0	0
miR-7040-5p	0	0.276569	0	0
miR-7065-5p	0.266703	0	0	0
miR-6903-5p	0	0.276569	0	0
miR-6911-5p	0	0.276569	0	0
miR-6952-5p	0	0.276569	0	0
miR-7662-5p	0	0.276569	0	0
miR-6912-5p	0	0.276569	0	0
miR-488-5p	0.266703	0	0	0
miR-1968-3p	0.266703	0	0	0
miR-135a-5p	0	0.276569	0	0
miR-6989-3p	0	0.276569	0	0
miR-598-5p	0.266703	0	0	0
miR-467e-3p	0	0.276569	0	0
miR-8111	0	0.508553	0	0
miR-5617-5p	0.491709	0	0	0
miR-6933-3p	0.266703	0	0	0
miR-297b-5p	0.491709	0	0	0
miR-7049-5p	0.266703	0	0	0
miR-3079-5p	0	0.508553	0	0
miR-7024-5p	0.266703	0	0	0
miR-298-3p	0.266703	0.276569	0	0
miR-7676-3p	0.266703	0.276569	0	0
miR-6998-5p	0	0	0.238354	0.234808
miR-6970-3p	0	0	0.238354	0
miR-1953	0	0	0	0.234808
miR-122-5p	0	0	2.01934	0.436695
miR-5132-3p	0	0	0.238354	0.234808
miR-341-3p	0	0	0.238354	0
miR-7041-5p	0	0	0.621935	0.234808
miR-1946a	0	0	0	0.436695
miR-873b	0	0	0.238354	0
miR-466m-5p	0	0	0.238354	0.234808
miR-7681-5p	0	0	0	0.436695
miR-6927-3p	0	0	0.238354	0
miR-6955-5p	0	0	0.442855	0.613768
miR-7651-5p	0	0	0.238354	0
miR-935	0	0	0.238354	0
miR-1945	0	0	0	0.436695
miR-7068-5p	0	0	0	0.234808
let-7k	0	0	0.238354	0.234808
miR-7079-3p	0	0	0	0.234808
miR-694	0	0	0.78122	0.234808
miR-6990-5p	0	0	0.442855	0
miR-6395	0	0	0.238354	0.436695
miR-3075-5p	0	0	0.238354	0
miR-7667-3p	0	0	0	0.234808
miR-466i-3p	0	0	0	0.436695
miR-466m-3p	0	0	0.238354	0
miR-1199-3p	0	0	0	0.234808
miR-153-5p	0	0	0	0.234808
miR-6922-3p	0	0	0	0.234808
miR-96-3p	0	0	0.238354	0.613768
miR-7663-3p	0	0	0.621935	0.234808
miR-106a-5p	0	0	0.924655	0
miR-1969	0	0	0	0.234808
miR-8094	0	0	0.621935	0.436695
miR-3108-3p	0	0	0.238354	0
miR-758-3p	0	0	0.238354	0
miR-429-3p	0	0	1.05511	0
miR-7677-3p	0	0	0.238354	0
miR-1967	0	0	0	0.234808
miR-7031-5p	0	0	0	0.234808
miR-7655-3p	0	0	0.238354	0
miR-7216-5p	0	0	0	0.234808
miR-3076-5p	0	0	0.442855	0.234808
miR-6960-3p	0	0	0	0.234808
miR-7036b-5p	0	0	0.238354	0
miR-669m-5p	0	0	0.238354	0.234808
miR-369-3p	0	0	0.238354	0
miR-5129-5p	0	0	0	0.234808
miR-7059-5p	0	0	0.238354	0.234808
miR-6916-5p	0	0	0.238354	0.234808
miR-7085-3p	0	0	0	0.234808
miR-379-3p	0	0	0.238354	0
miR-7047-3p	0	0	0.621935	0
miR-3474	0	0	0.238354	0
miR-3472	0	0	0	0.234808
miR-669f-3p	0	0	0.442855	0
miR-1231-3p	0	0	0.238354	0.771464
miR-547-5p	0	0	0.238354	0.234808
miR-1932	0	0	0	0.234808
miR-7008-3p	0	0	0	0.234808
miR-122-3p	0	0	0.238354	0
miR-7665-5p	0	0	0.238354	0
miR-5622-5p	0	0	0.238354	0
miR-6971-3p	0	0	0.238354	0
miR-7036a-3p	0	0	0.238354	0
miR-7093-5p	0	0	0	0.234808
miR-5132-5p	0	0	0	0.234808
miR-704	0	0	0.442855	0
miR-7231-5p	0	0	0.238354	0
miR-6940-3p	0	0	0	0.234808
miR-466k	0	0	0	0.436695
miR-7022-3p	0	0	0	0.234808
miR-7045-3p	0	0	0	0.234808
miR-101b-5p	0	0	0.238354	0.234808
miR-6936-3p	0	0	0.238354	0
miR-7064-5p	0	0	0.238354	0.234808
miR-6899-3p	0	0	0	0.234808
miR-677-3p	0	0	0.238354	0.234808
miR-1895	0	0	0.442855	0
miR-3098-3p	0	0	0	0.234808
miR-7228-5p	0	0	0	0.436695
miR-6951-5p	0	0	0.442855	0
miR-126b-5p	0	0	0	0.234808
miR-466i-5p	0	0	0.557357	0.714328
miR-300-3p	0	0	0.238354	0.771464
miR-5125	0	0	0	0.436695
miR-6976-5p	0	0	0.238354	0
miR-215-3p	0	0	0	0.234808
miR-669o-5p	0	0	0.442855	0.771464
miR-3086-3p	0	0	0.238354	0
miR-7021-5p	0	0	0.238354	0
miR-7685-5p	0	0	0	0.234808
miR-6931-3p	0	0	0.238354	0.234808
miR-376b-5p	0	0	0	0.234808
miR-669e-5p	0	0	0	0.436695
miR-3110-5p	0	0	0	0.234808
miR-6898-5p	0	0	0	0.234808
miR-3108-5p	0	0	0.924655	0
miR-223-3p	0	0	0.238354	0
miR-211-5p	0	0	0	0.436695
miR-6990-3p	0	0	0	0.234808
miR-669a-3-3p	0	0	0.238354	0
miR-3102-5p	0	0	0.238354	0
miR-7117-5p	0	0	0	0.234808
miR-7092-3p	0	0	0	0.234808
miR-449b	0	0	0.238354	0
miR-5129-3p	0	0	0.442855	0
miR-7042-5p	0	0	0.442855	0.234808
miR-6977-3p	0	0	0	0.613768
miR-1933-5p	0	0	0.238354	0
miR-3473e	0	0	0	0.234808
miR-3083-5p	0	0	0	0.234808
miR-6905-3p	0	0	0	0.234808
miR-7658-3p	0	0	0	0.436695
miR-7054-3p	0	0	0	0.234808
miR-18b-5p	0	0	0	0.234808
miR-7046-3p	0	0	0.238354	0.234808
miR-3066-3p	0	0	0.238354	0.234808
miR-8106	0	0	0	0.234808
miR-7672-3p	0	0	0.238354	0
miR-709	0	0	0.238354	0
miR-706	0	0	0.238354	0
miR-6948-5p	0	0	0.238354	0
miR-3113-3p	0	0	0	0.234808
miR-1966-5p	0	0	0.238354	0
miR-8105	0	0	0.238354	0
miR-7680-5p	0	0	0	0.234808
miR-139-3p	0	0	0.238354	0.234808
miR-7240-5p	0	0	0	0.234808
miR-466h-3p	0	0	0.442855	0.844286
miR-8118	0	0	0.442855	0
miR-3064-3p	0	0	0.78122	0.436695
miR-3154	0	0	0	0.234808
miR-669c-3p	0	0	0.238354	0
miR-7017-5p	0	0	0	0.234808
miR-467c-3p	0	0	0.238354	0.234808
miR-6915-3p	0	0	0.238354	0
miR-3969	0	0	0	0.436695
miR-7025-3p	0	0	0.442855	0
miR-6909-5p	0	0	0.238354	0
miR-7013-3p	0	0	0.238354	0
miR-136-5p	0	0	0.238354	0
miR-92b-5p	0	0	0	0.234808

## Sheet: Table S5
Table S5. the variation analyse for sequencing
results were generated by OmicShare tools
miRNA	NC-1	NC-2	GAA-1	GAA-2	NC-1 CPM	NC-2 CPM	GAA-1 CPM	GAA-2 CPM	NC mean	GAA mean	log2(fc)	PValue	FDR
miR-133a-3p	15065	17922	12531	13631	9109.31	8677	3998.1	4781.42	8893.16	4389.76	-1.01855	7.18e-06	0.00207846
miR-144-3p	25	9	1	4	15.12	4.36	0.32	1.4	9.74	0.86	-3.50151	1.32e-05	0.00275803
miR-1843b-3p	12	5	56	52	7.26	2.42	17.87	18.24	4.84	18.055	1.89932	3.05e-05	0.00379017
miR-1a-3p	169	218	151	109	102.19	105.55	48.18	38.23	103.87	43.205	-1.26551	3.2e-06	0.00138863
miR-208b-3p	92	84	17	8	55.63	40.67	5.42	2.81	48.15	4.115	-3.54857	1.49e-18	1.3e-15
miR-335-3p	46	50	31	24	27.81	24.21	9.89	8.42	26.01	9.155	-1.50643	1.81e-05	0.00275803
miR-6412	12	8	1	1	7.26	3.87	0.32	0.35	5.565	0.335	-4.05415	1.9e-05	0.00275803
miR-671-3p	57	79	216	231	34.47	38.25	68.92	81.03	36.36	74.975	1.04406	0.000238248	0.0207038
